# Supplementary material for: A20 as an immune tolerance factor can determine islet transplant outcomes
Source: JCI journal article supplement (doi:10.1172/jci.insight.131028), 2019-10-03
Supplement: sd1 [file 1]

## Supplementary data

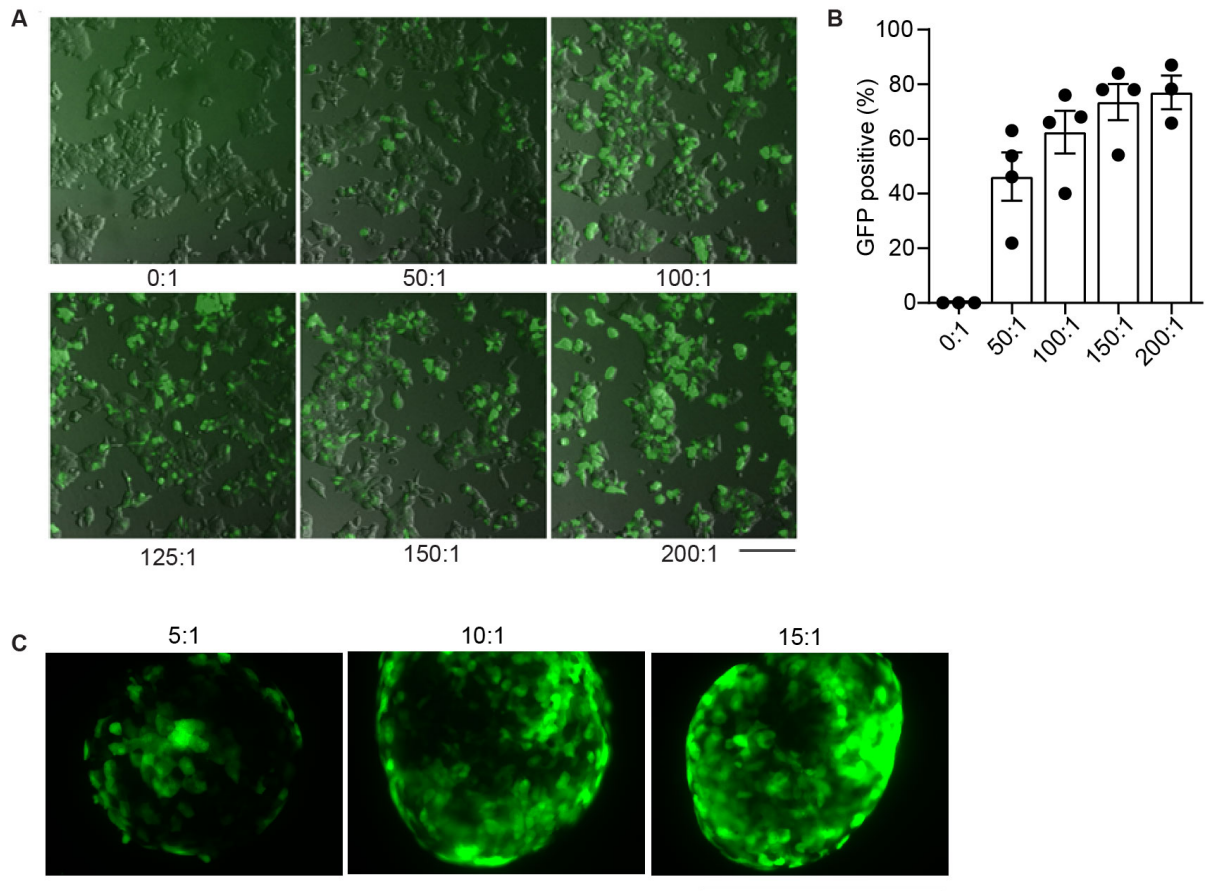

**Supplemental figure 1. Recombinant adenovirus transduction of MIN6 cells and mouse islets.** (A) Representative fluorescent microscopic image of a MIN6 cell line transduced with rAd.GFP at a range of multiplicity of infection as indicated, or left non-infected (NI, 0:1) and left to culture for 48 h (scale bar = 40  $\mu$ m). (B) Percent of GFP positive MIN6 cells quantified using flow cytometry. Each point represents a well of cells, cumulated from two independent experiments. (C) Fluorescent microscopic image of isolated primary mouse islets transduced with rAd.GFP at a multiplicity of infection of 5:1, 10:1 or 15:1 and cultured for 48 hours (scale bar = 100  $\mu$ m). Representative of three independent isolations.

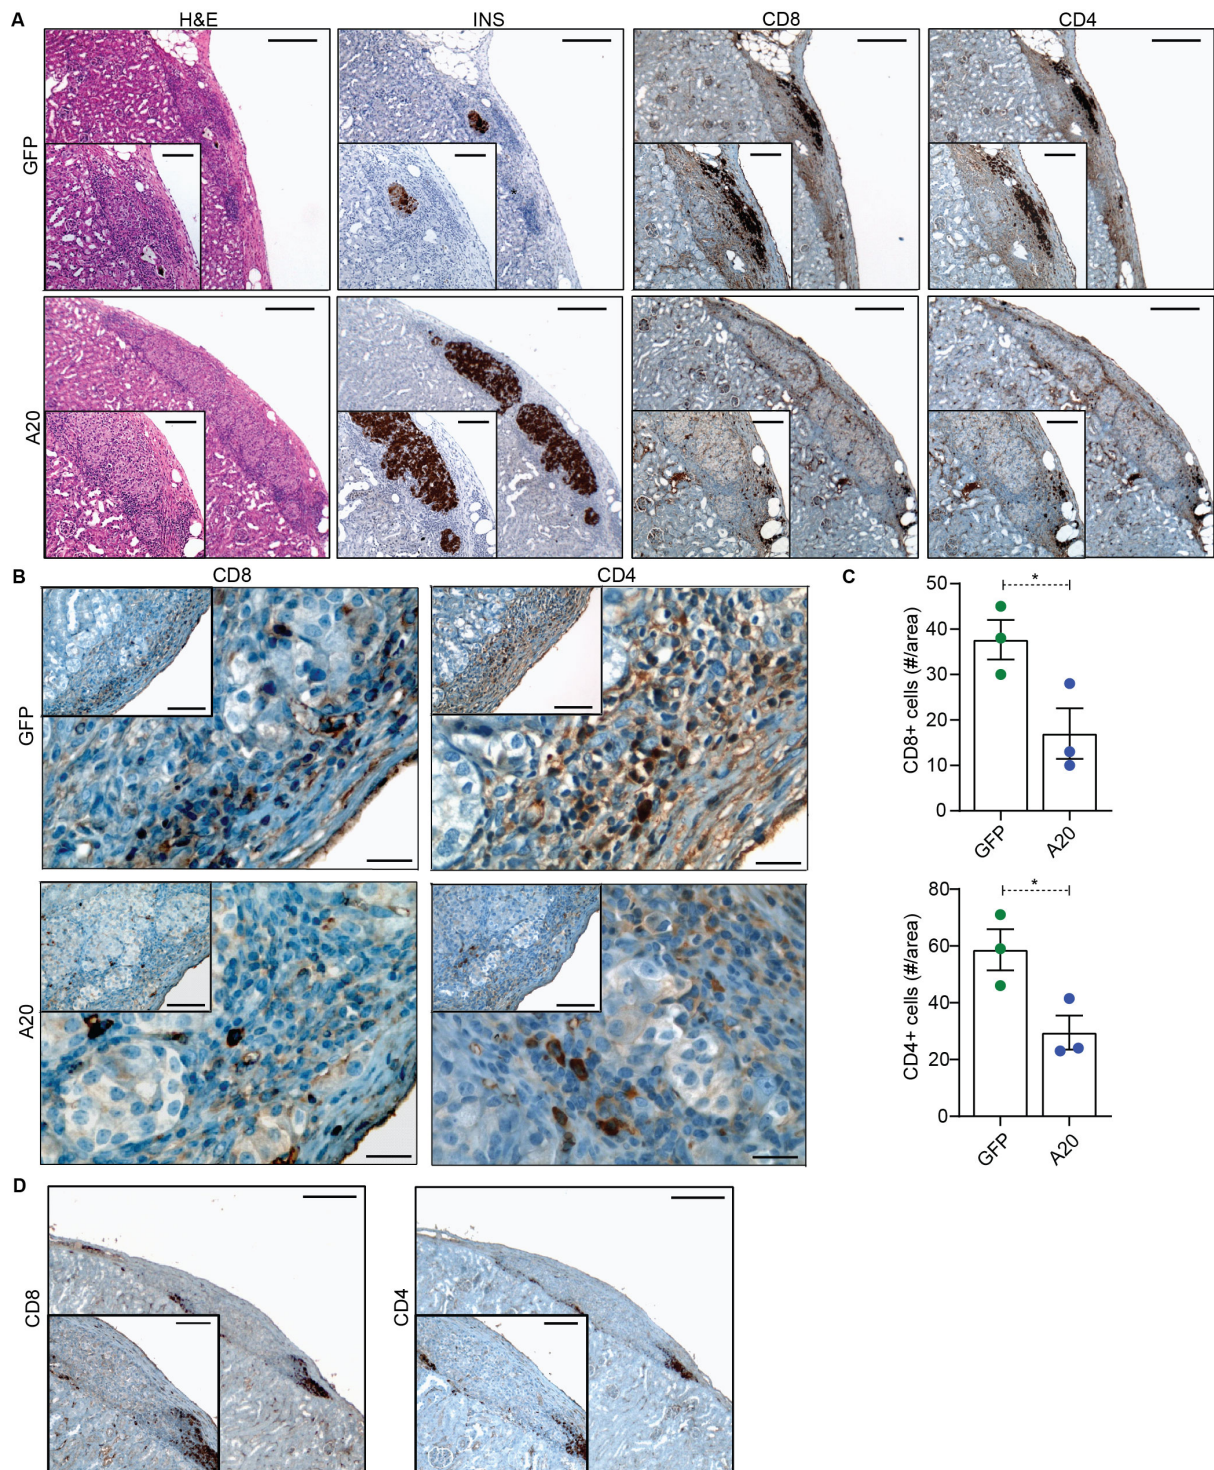

**Supplemental figure 2. Histological analysis of CD4 and CD8 T cells in A20 and GFP expressing grafts. (A)** Hematoxylin & Eosin (H&E), insulin (INS), CD8 or CD4 staining of islet allografts transduced with adenovirus encoding GFP or A20 prior to transplantation and harvested at post-operative day (POD) 18, prior to rejection of control grafts (Scale bar = 25  $\mu$ m and panel insert = 100  $\mu$ m). Data is representative of 3 GFP or A20 expressing grafts. **(B)** CD8 or CD4 staining of islet allografts transduced with adenovirus encoding GFP or A20 prior to transplantation and harvested at post-operative day (POD) 10. Scale bar = 25  $\mu$ m and insert panel = 100  $\mu$ m. Representative of 3 GFP or A20 expressing grafts. The average number of CD8 or CD4 positively stained cells per 40 $\times$  field of view per islet graft is shown in **(C)**. **(D)** CD8 or CD4

staining of long-term surviving A20 transduced islet allografts harvested at POD 100. Scale bar = 200  $\mu\text{m}$  and insert panel = 100  $\mu\text{m}$ , representative of 6 long-term surviving islet grafts.

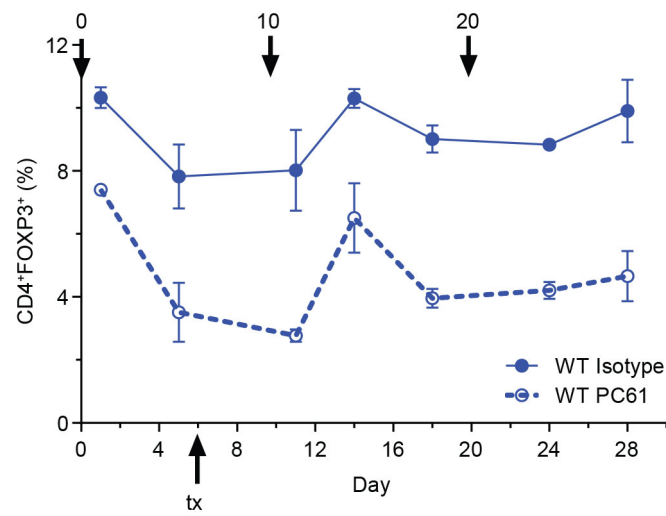

**Supplemental figure 3. PC61 mAb treatment of wild-type mice.** C57/BL6 recipients given repeated doses of  $\alpha$ CD25, clone PC61 mAb ( $n = 3$ ), or an isotype-control ( $n = 3$ ) and percentage of FOXP3<sup>+</sup>CD4<sup>+</sup> T cells assessed in the blood by flow cytometry.

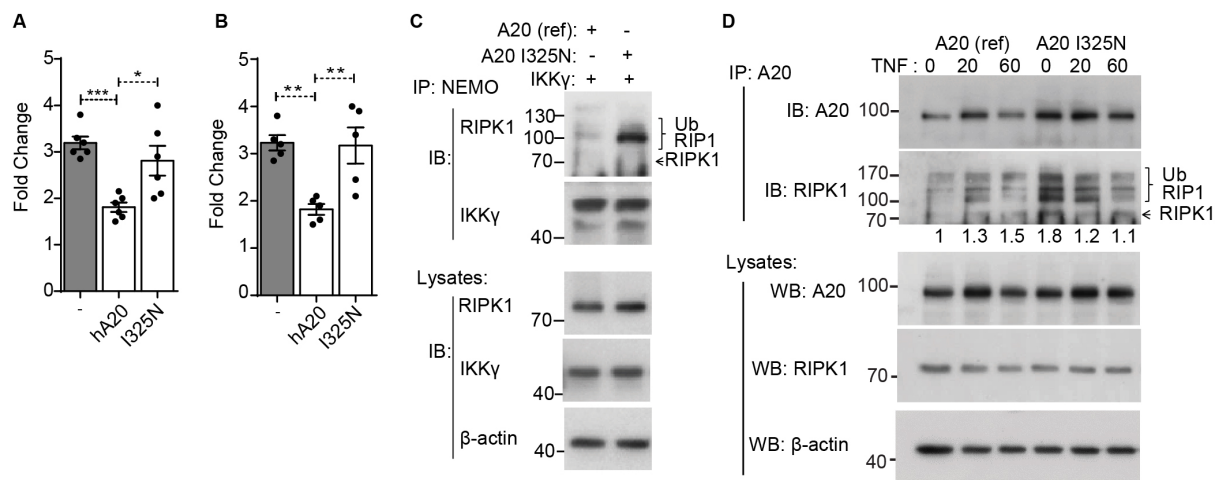

**Supplemental figure 4. Human A20 I325N exhibits impaired NF- $\kappa$ B and AP-1 suppression.** (A, B)  $\beta$ TC3 cells co-transfected with an NF- $\kappa$ B.luciferase reporter (A), or an AP-1 luciferase reporter (B) and a CMV. $\beta$ gal expression construct with or without PCDNA3.1 encoding human (h) reference A20, or A20 with an I325N coding variant. Cells were stimulated with 200 U/ml TNF for 8 h or left untreated. Data represents fold change of stimulated versus non-stimulated, and representative from three independent experiments. (C) Immunoblot (IB) of NEMO (IKK $\gamma$ ) immunoprecipitated (IP) lysates from  $\beta$ TC3 cells transfected with reference A20 or A20 I325N and IKK $\gamma$  with corresponding whole-cell lysates shown. Data represents two biological replicates. (D) Immunoblot (IB) of A20 immunoprecipitated (IP) lysates and whole-cell lysates from  $\beta$ TC3 cells transfected with reference A20 or A20 I325N. Following an overnight incubation cells were stimulated with TNF for the indicated times. Membranes were probed for RIPK1, A20 or  $\beta$ -actin (loading control). Data represents two independent experiments. Statistical significance determined by 1-way ANOVA with Tukey's multiple-comparisons post hoc test. Error bars represent s.e.m, \* $P$ <0.05; \*\* $P$ <0.01; \*\*\* $P$ <0.001.

## Supplemental Table 1

Mouse primers used for qRT-PCR analysis.

| Gene                          | Primer sequence                                                        |
|-------------------------------|------------------------------------------------------------------------|
| <i>Tnfrif3</i>                | F-5'-CCTGTCACCAACGCTCCAAG-3'<br>R-5'-ATTTCCAGTCCGGTGGCAAG-3'           |
| <i>Ccl2</i>                   | F- 5'-GGTCCCTGTCATGCTTCTGG-3'<br>R- 5'-CCTGCTGCTGGTGATCCTCT-3'         |
| <i>Ccl22</i>                  | F-5'-AAGCCTGGCGTTGTTTTGAT-3'<br>R-5'-TCCCTAGGACAGTTTATGGAGTAGCT-3'     |
| <i>Cd3</i>                    | F-5'-GCCTCAGAAGCATGATAAGC-3'<br>R-5'-CCCAGAGTGATACAGATGTC-3'           |
| <i>Cd80</i>                   | F-5'-ATGGCTTGCAATTGTCAGTTGA-3'<br>R-5'-ATCAGGAGGGTCTTCTGGGGGGGT-3'     |
| <i>Cd86</i>                   | F-5'-TCCAGAACTTACGCAAGCACCCA-3'<br>R-5'-CAGGTTCACTGAAGTTGGCGATCAC-3'   |
| <i>Cph2</i>                   | F- 5'-TGGACCAAACACAAACGGTTC-3'<br>R- 5'-ACATTGCGAGCAGATGGGGT-3'        |
| <i>Ctla4</i>                  | F- 5'-GTAGCCCTGCTCACTCTTCTT-3'<br>R- 5'-AGGTACAGTCCCGTGTCAAC-3'        |
| <i>Cxcl1</i>                  | F- 5'-TGGCTGGGATTCACCTCAAG-3'<br>R- 5'-TATGACTTCGGTTTGGGTGCAG-3'       |
| <i>Cxcl2</i>                  | F- 5'-CACTCTCAAGGGCGGTCAA-3'<br>R- 5'-TCAGTTAGCCTTGCCTTTGTTCA-3'       |
| <i>Cxcl10</i>                 | F- 5'-GACGGGCCAGTGAGAATGAG-3'<br>R- 5'-GTGTGTGCGTGGCTTCACTC-3'         |
| <i>Foxp3</i>                  | F- 5'-CCCACCTACAGGCCCTTCTC-3'<br>R- 5'-GGCATGGGCATCCACAGT-3'           |
| <i>Icam1</i>                  | F- 5'-CCATGGGAATGTCACCAGGA-3'<br>R- 5'-ATCACGAGGCCCAATGAC-3'           |
| <i>Ifn<math>\gamma</math></i> | F- 5'-AGCAACAGCAAGGCGAAAAA-3'<br>R- 5'-AGCTCATTGAATGCTTGGCG-3'         |
| <i>Il6</i>                    | F- 5'-TCCTTCCTACCCCAATTTCAA-3'<br>R- 5'-TGGATGGTCTTGGTCCTTAGCC-3'      |
| <i>Il10</i>                   | F- 5'-TGTGAAAATAAGAGCAAGGCAGTG-3'<br>R- 5'-CATTTCATGGCCTTGTTAGACACC-3' |
| <i>Tgf<math>\beta</math></i>  | F- 5'-AGTCGGCCTCCGCTGG-3'<br>R- 5'-GCTGTCTGGAGTCCTCAGGT-3'             |
| <i>Tnf</i>                    | F- 5'-ATGGCCCAGACCCTCACACT-3'<br>R- 5'-TGGTGGTTTGCTACGACGTG-3'         |

**Supplemental Table 2**

Human primers used for qRT-PCR analysis.

| <b>Gene</b>    | <b>Primer sequence</b>                                                |
|----------------|-----------------------------------------------------------------------|
| <i>CCL2</i>    | F- 5'- AGGTGACTGGGGCATTGAT -3'<br>R- 5'- GCCTCCAGCATGAAAGTCTC -3'     |
| <i>ICAM1</i>   | F- 5'- AGTTGCTCCTGCCTGGGAAC -3'<br>R- 5'- TTTAGCTGTTGACTGCCCATCAG -3' |
| <i>RPL13a</i>  | F- 5'- CAAGCGGATGAACACCAAC-3'<br>R- 5'- TGTGGGGCAGCATACTC -3'         |
| <i>TNFAIP3</i> | F- 5'- AACGAACGGTGACGGCAAT-3'<br>R- 5'- GAAGTCCACTTCGGGCCAT-3'        |
| <i>TNF</i>     | F- 5'- TCCCCTGGAAAGGACACCAT-3'<br>R- 5'- GGGTTTGCTACAACATGGGCT-3'     |
